# Supplementary material for: Sagittal knee gait changes after medial unicompartmental and total knee arthroplasty – an exploratory analysis of 36 patients
Source: Research Square preprint supplement (doi:10.21203/rs.3.rs-3879283/v1), 2024-01-29
Supplement: Supplementary file 1 [file 4d96f6b7f7631c8b01f399bf.docx]

**Supplementary material: Description of our method for gait-analysis**

*Stride cycle identification*

Stride frequency was identified based on least-squares spectral analysis for unevenly sampled data, which is a method of counting the frequency in cyclical data. Specifically, we used the Lomb-Scargle algorithm (**Supplementary fig. 1**).

**Supplementary fig. 1:** Depiction of raw data of 3 gait cycles, over time.


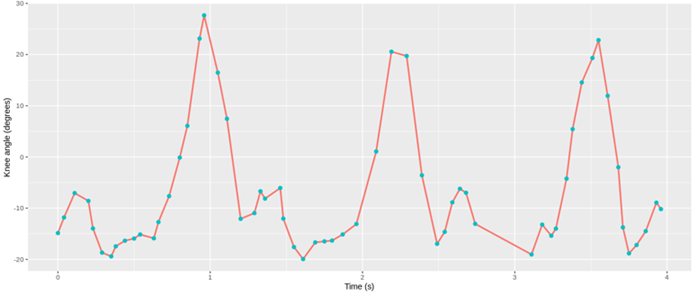


An algorithmic search for peaks and troughs based on the stride period and fitting of a second-degree polynomial to the sample neighborhood of maximum and minimum angles was carried out. The root of each second-degree polynomial defined the time of peaks and troughs. (**Supplementary fig. 2**).

**Supplementary fig. 2:** Identified peaks (red points) and troughs (orange points) in a recording session of 60 seconds.


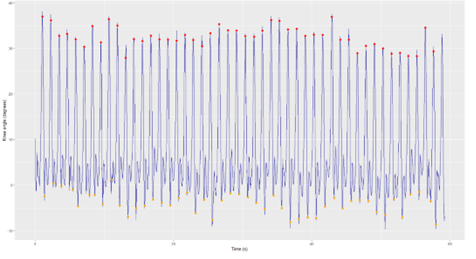


We defined a stride cycle from a peak to the subsequent peak. All stride cycles were then resampled, using linear interpolation and upsampling meaning that an equal number of data points were used in all stride cycles. The average stride period was defined as 2·pi (radians). The calculated parameters were later normalized to seconds.

*Gait parameters*

A Fourier series was used to create a mathematical function, which fits the raw data. This allowed the calculation of derivatives and integrals (**Supplementary fig. 3**):

**Supplementary fig. 3:** Fourier expansion fits raw data.


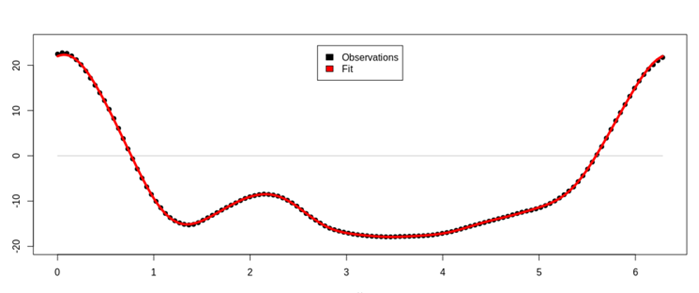


. From this function, the first and second derivatives were calculated, resulting in functions of angular velocity and acceleration (**Supplementary fig 4a-c**). We also determined the integral of the Fourier series, which divided by 2·pi yielded the mean knee angle

**Supplementary fig. 4-a:** Graph of an average gait cycle for one data recording. Radians, or position in the gait cycle, are expressed on the x-axis and sagittal knee joint angles are expressed on the y-axis. The maximum knee angle marks the beginning of the gait cycle because it is an easily found landmark in all gait cycles. One cycle is defined as 2 · π radians. Swing- and stance phases are marked in the gait cycle.


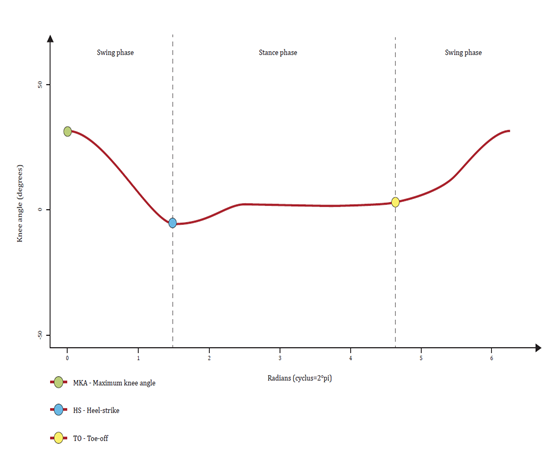


**Supplementary fig. 4-b:** Graph of average angular velocity (1st derivative of the gait cycle) for one data recording. Positive values of angular velocity correspond to flexion of the knee, while negative values of angular velocity correspond to an extension of the knee.


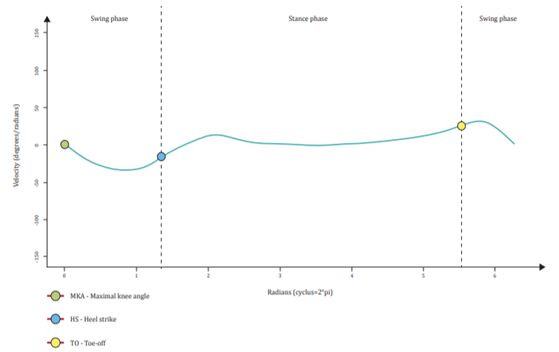


**Supplementary fig. 4-c:** Graph of average angular acceleration (2nd derivative) for one data recording.


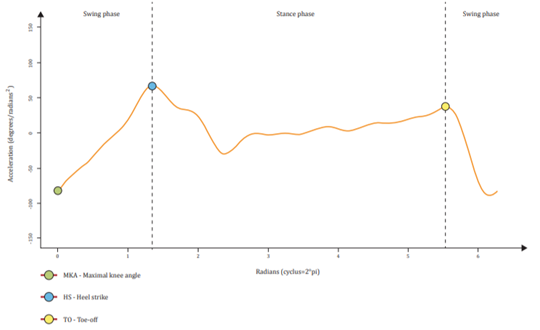


*Robustness of algorithm*

The principles behind the algorithm have been described in previous studies, which have used event landmarking (15). A second algorithm was created as a sensitivity check and applied to the endpoints. The second algorithm used simple linear interpolation between points of raw data to ensure evenly spaced points. Strides were detected through rainflow counting (17) and defined as cycles with an amplitude above 20 degrees. Then, a coordinate transformation was performed such that the stride variables (time and knee flexion angle) were described in terms of a common dimensionless parameter *s* allowing all strides to be plotted and evaluated on the same domain. Expressions for angular velocity and acceleration were derived and calculated from the data using first and second-order finite differences. This method is described in most textbooks on numerical methods. For AUC calculations the trapezoidal rule as implemented in the Python “numpy” library was used.
